# Supplementary material for: Decreased testosterone secretion index and free testosterone level with multiple symptoms for late-onset hypogonadism identification: a nationwide multicenter study with 5980 aging males in China
Source: publisher site journal article supplement (doi:10.18632/aging.202227), 2020-11-21
Supplement: Supplementary file [file aging-v12i24-202227-supplementary-material-SD1.pdf]

## SUPPLEMENTARY FIGURE

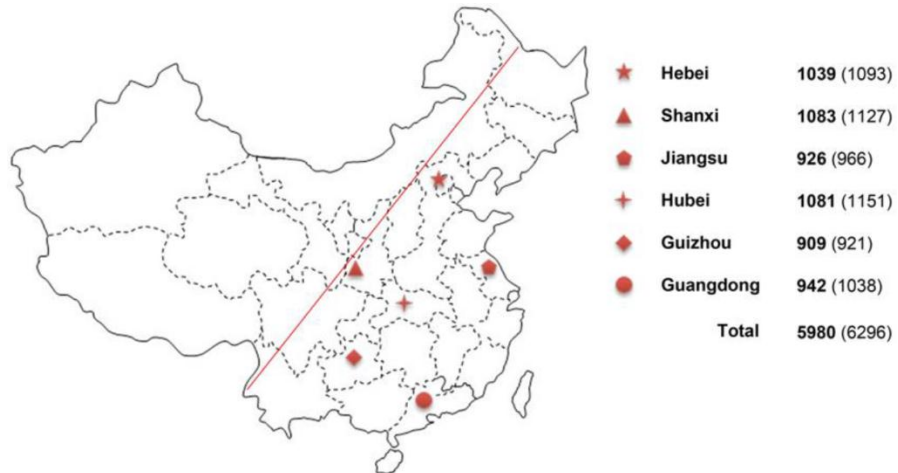

**Supplementary Figure 1. Participants recruited from six representative areas (provinces) in China with relatively dense population.** Population of the areas on the right of the red line accounts for 94% of total population of China. Numbers in the bracket denote the total number before the exclusion.
