# Supplementary material for: Decreased testosterone secretion index and free testosterone level with multiple symptoms for late-onset hypogonadism identification: a nationwide multicenter study with 5980 aging males in China
Source: Aging (Albany NY). 2020 Nov 21;12(24):26012–28. doi: 10.18632/aging.202227 (PMC7803574; doi:10.18632/aging.202227)
Supplement: Supplementary Tables [file aging-12-202227-s002.pdf]

## SUPPLEMENTARY TABLES

**Supplementary Table 1. Hormone differences among BMI groups.**

| Hormones | BMI group 1       | BMI group 2       | P value |
|----------|-------------------|-------------------|---------|
| TT       | BMI <24           | 24= $\leq$ BMI<28 | <0.001  |
|          | BMI<24            | BMI $\geq$ 28     | <0.001  |
|          | 24= $\leq$ BMI<28 | BMI $\geq$ 28     | <0.001  |
| cFT      | BMI <24           | 24= $\leq$ BMI<28 | <0.001  |
|          | BMI<24            | BMI $\geq$ 28     | 0.124   |
|          | 24= $\leq$ BMI<28 | BMI $\geq$ 28     | 0.344   |
| LH       | BMI <24           | 24= $\leq$ BMI<28 | <0.001  |
|          | BMI<24            | BMI $\geq$ 28     | <0.001  |
|          | 24= $\leq$ BMI<28 | BMI $\geq$ 28     | 0.335   |
| SHBG     | BMI <24           | 24= $\leq$ BMI<28 | <0.001  |
|          | BMI<24            | BMI $\geq$ 28     | <0.001  |
|          | 24= $\leq$ BMI<28 | BMI $\geq$ 28     | <0.001  |
| FTI      | BMI <24           | 24= $\leq$ BMI<28 | <0.001  |
|          | BMI<24            | BMI $\geq$ 28     | <0.001  |
|          | 24= $\leq$ BMI<28 | BMI $\geq$ 28     | <0.001  |
| TSI      | BMI <24           | 24= $\leq$ BMI<28 | 0.587   |
|          | BMI<24            | BMI $\geq$ 28     | <0.001  |
|          | 24= $\leq$ BMI<28 | BMI $\geq$ 28     | <0.001  |

**Supplementary Table 2. Factors associated with TT levels.**

| Factors          | $\beta$ | p value | $\beta$ (95% CI) |
|------------------|---------|---------|------------------|
| BMI              | -0.511  | 0.000   | (-0.550, -0.473) |
| Residence        | 0.592   | 0.000   | (0.440, 0.745)   |
| Smoking          | 0.383   | 0.000   | (0.180, 0.585)   |
| Alcohol-drinking | -0.261  | 0.000   | (-0.405, -0.117) |
| Marital status   | 0.527   | 0.002   | (0.200, 0.854)   |
| Age              | -0.009  | 0.199   | (-0.023, 0.005)  |

Factors associated with TT levels were screened using stepwise multiple linear regression in all participants. Then relationship between TT levels and these factors and age were analyzed using multiple linear regression. Age was not correlated TT.

**Supplementary Table 3. Characteristics of the training set and validation set at baseline.**

| Variable                                      | Training Set<br>(n=2978) | Validation Set<br>(n=3002) |
|-----------------------------------------------|--------------------------|----------------------------|
| <b>Age and anthropometric measures</b>        |                          |                            |
| Age, mean (SD), years                         | 55.8 (9.3)               | 56.1 (9.4)                 |
| Height, mean (SD), cm                         | 165.3 (6.4)              | 165.1 (6.3)                |
| Weight, mean (SD), kg                         | 66.3 (10.6)              | 66.3 (10.6)                |
| Body-mass index, mean (SD), kg/m <sup>2</sup> | 24.2 (3.3)               | 24.3 (3.3)                 |
| Waist circumference, mean (SD), cm            | 86.6 (11.2)              | 87.1 (11.0)                |
| <b>Health status</b>                          |                          |                            |
| SF-36 score, mean (SD)                        |                          |                            |
| Physical functioning                          | 83.5 (20.6)              | 84.0 (20.8)                |
| Physical role                                 | 67.0 (42.8)              | 70.0 (41.3)                |
| Body pain                                     | 76.4 (17.5)              | 77.2 (17.2)                |
| General health                                | 62.7 (21.2)              | 62.5 (20.8)                |
| Vitality                                      | 68.8 (15.9)              | 69.0 (16.4)                |
| Social role                                   | 45.2 (13.2)              | 45.5 (12.8)                |
| Emotional role                                | 73.3 (41.3)              | 75.3(39.7)                 |
| Mental health                                 | 68.4 (15.1)              | 68.1 (15.6)                |
| Beck Depression Inventory                     | 2.87 (4.40)              | 2.92 (4.32)                |
| <b>Hormone levels</b>                         |                          |                            |
| Testosterone                                  |                          |                            |
| TT, mean (SD), nmol/L                         | 16.3 (5.4)               | 16.0 (5.0)                 |
| cFT, ean (SD), nmol/L                         | 0.28 (0.97)              | 0.27 (0.86)                |
| SHBG, mean (SD), nmol/L                       | 46.9 (22.8)              | 47.0 (23.1)                |
| <b>Lifestyle variables</b>                    |                          |                            |
| Sexual-partner status, No./total No. (%)      |                          |                            |
| Partner                                       | 2926/2972(98.5)          | 2955/2999(98.5)            |
| No partner                                    | 46/2972(1.5)             | 44/2999(1.5)               |
| Smoking status, No./total No. (%)             |                          |                            |
| Never smoked                                  | 954/2961(32.2)           | 934/2990(31.2)             |
| Former smoker                                 | 358/2961(12.1)           | 333/2990(11.1)             |
| Current smoker                                | 1649/2961(55.7)          | 1721/2990(57.6)            |
| Alcohol intake, No./total No. (%)             |                          |                            |
| None                                          | 848/2953(28.7)           | 801/2986(26.8)             |
| Occasionally                                  | 1058/2953(35.8)          | 1112/2986(37.2)            |
| Often                                         | 887/2953(30.1)           | 918/2986(30.8)             |
| Stop drinking                                 | 160/2953(5.4)            | 155/2986(5.2)              |
| Body-mass index, No./total No. (%)            |                          |                            |
| <25                                           | 1815/2978(61.0)          | 1800/3002(59.8)            |
| ≥25 to <30                                    | 1021/2978(34.3)          | 1053/3002(35.1)            |
| ≥30                                           | 142/2978(4.8)            | 149/3002(5.0)              |
| Coexisting illness, No./total No. (%)         |                          |                            |
| Number                                        |                          |                            |
| 0                                             | 2008/2978(67.4)          | 1927/3002(64.2)            |
| 1                                             | 715/2978(24.0)           | 811/3002(27.0)             |
| ≥2                                            | 257/2978(8.6)            | 265/3002(8.8)              |
| Type                                          |                          |                            |
| Heart disease                                 | 128/2978(4.3)            | 131/3002(4.4)              |
| Hypertension                                  | 508/2978(17.0)           | 586/3002(19.5)             |
| Chronic bronchitis or asthma                  | 208/2978(7.0)            | 215/3002(7.2)              |
| Diabetes                                      | 111/2978(3.7)            | 130/3002(4.3)              |

|                  |               |               |
|------------------|---------------|---------------|
| Prostate disease | 141/2978(4.7) | 139/3002(4.6) |
| Cancer           | 19/2878(0.6)  | 23/3002(0.8)  |
| Stroke           | 76/2978(2.6)  | 73/3002(2.4)  |
| Tuberculosis     | 39/2978(1.3)  | 41/3002(1.4)  |
| Hepatitis        | 59/2978(2.0)  | 65/3002(2.2)  |

**Supplementary Table 4. Symptoms screening by ordinal regression.**

| Scale     | Symptoms                                                                                                                                                                         | P value |
|-----------|----------------------------------------------------------------------------------------------------------------------------------------------------------------------------------|---------|
| AMS scale | Decline in your feeling of general well-being                                                                                                                                    | 0.087   |
|           | Joint pain and muscular ache                                                                                                                                                     | 0.112   |
|           | Excessive sweating                                                                                                                                                               | 0.020   |
|           | Sleep problems                                                                                                                                                                   | 0.051   |
|           | Increased need for sleep, often feeling tired                                                                                                                                    | 0.000   |
|           | Irritability                                                                                                                                                                     | 0.000   |
|           | Nervousness                                                                                                                                                                      | 0.001   |
|           | Anxiety                                                                                                                                                                          | 0.003   |
|           | Physical exhaustion / lacking vitality                                                                                                                                           | 0.001   |
|           | Decrease in muscular strength                                                                                                                                                    | 0.000   |
|           | Depressive mood                                                                                                                                                                  | 0.208   |
|           | Feeling that you have passed your peak                                                                                                                                           | 0.764   |
|           | Feeling burnt out, having hit rock-bottom                                                                                                                                        | 0.001   |
|           | Decrease in beard growth                                                                                                                                                         | 0.000   |
|           | Decrease in ability/frequency to perform sexually                                                                                                                                | 0.000   |
|           | Decrease in the number of morning erections                                                                                                                                      | 0.000   |
|           | Decrease in sexual desire/libido                                                                                                                                                 | 0.000   |
| SF-36     | In general, would you say your health is ?                                                                                                                                       | 0.531   |
|           | Compared to one year ago, how would you rate your health in general now?                                                                                                         | 0.000   |
|           | Does your health now limit you in:                                                                                                                                               |         |
|           | Vigorous activities                                                                                                                                                              | 0.009   |
|           | Moderate activities                                                                                                                                                              | 0.000   |
|           | Lifting or carrying groceries                                                                                                                                                    | 0.261   |
|           | Climbing several flights of stairs                                                                                                                                               | 0.000   |
|           | Climbing one flight of stairs                                                                                                                                                    | 0.001   |
|           | Bending, kneeling, or stooping                                                                                                                                                   | 0.074   |
|           | Walking more than 1500 meters                                                                                                                                                    | 0.027   |
|           | Walking 800 meters                                                                                                                                                               | 0.004   |
|           | Walking 100 meters                                                                                                                                                               | 0.031   |
|           | Bathing or dressing yourself                                                                                                                                                     | 0.060   |
|           | During the past 4 weeks, have you had any of the following problems with your work or other regular daily activities as a result of your physical health?                        |         |
|           | Cut down the amount of time you spent on work or other activities                                                                                                                | 0.000   |
|           | Accomplished less than you would like                                                                                                                                            | 0.000   |
|           | Were limited in the kind of work or other activities                                                                                                                             | 0.000   |
|           | Had difficulty performing the work or other activities                                                                                                                           | 0.000   |
|           | During the past 4 weeks, have you had any of the following problems with your work or other regular daily activities as a result of any emotional problems ?                     |         |
|           | Cut down the amount of time you spent on work or other activities                                                                                                                | 0.191   |
|           | Accomplished less than you would like                                                                                                                                            | 0.004   |
|           | Didn't do work or other activities as carefully as usual                                                                                                                         | 0.008   |
|           | During the past 4 weeks, to what extent has your physical health or emotional problems interfered with your normal social activities with family, friends, neighbors, or groups? | 0.040   |

|                                                                                                                                                                                                      |       |
|------------------------------------------------------------------------------------------------------------------------------------------------------------------------------------------------------|-------|
| How much bodily pain have you had during the past 4 weeks?                                                                                                                                           | 0.148 |
| During the past 4 weeks, how much did pain interfere with your normal work?                                                                                                                          | 0.012 |
| These questions are about how you feel and how things have been with you during the past 4 weeks. For each question, please give the one answer that comes closest to the way you have been feeling. |       |
| Did you feel full of pep?                                                                                                                                                                            | 0.11  |
| Have you been a very nervous person?                                                                                                                                                                 | 0.000 |
| Have you felt so down in the dumps that nothing could cheer you up?                                                                                                                                  | 0.012 |
| Have you felt calm and peaceful?                                                                                                                                                                     | 0.519 |
| Did you have a lot of energy?                                                                                                                                                                        | 0.000 |
| Have you felt downhearted and blue?                                                                                                                                                                  | 0.106 |
| Did you feel worn out?                                                                                                                                                                               | 0.144 |
| Have you been a happy person?                                                                                                                                                                        | 0.572 |
| Did you feel tired?                                                                                                                                                                                  | 0.369 |
| During the past 4 weeks, how much of the time has your physical health or emotional problems interfered with your social activities?                                                                 | 0.001 |
| I seem to get sick a little easier than other people                                                                                                                                                 | 0.149 |
| I am as healthy as anybody I know                                                                                                                                                                    | 0.094 |
| I expect my health to get worse                                                                                                                                                                      | 0.233 |
| My health is excellent                                                                                                                                                                               | 0.022 |

Beck Depression  
Inventory

|                      |       |
|----------------------|-------|
| Sadness              | 0.008 |
| Pessimism            | 0.133 |
| Past failure         | 0.001 |
| Loss of pleasure     | 0.044 |
| Guilty feeling       | 0.005 |
| Self-dislike         | 0.228 |
| Suicidal thoughts    | 0.082 |
| Lost of interest     | 0.001 |
| Indecisiveness       | 0.051 |
| Worthlessness        | 0.017 |
| Loss of energy       | 0.000 |
| Tiredness or fatigue | 0.677 |
| Changes in appetite  | 0.182 |

**Supplementary Table 5. Differences in hormones between subjects divided by cAMS scores.**

| cAMS Score | <i>P</i> value |       |       |       |
|------------|----------------|-------|-------|-------|
|            | TT             | cFT   | TSI   | FTI   |
| 11         | 0.673          | 0.363 | 0.481 | 0.416 |
| 12         | 0.884          | 0.209 | 0.339 | 0.272 |
| 13         | 0.949          | 0.308 | 0.184 | 0.610 |
| 14         | 0.694          | 0.231 | 0.039 | 0.277 |
| 15         | 0.975          | 0.130 | 0.047 | 0.054 |
| 16         | 0.905          | 0.079 | 0.024 | 0.012 |
| 17         | 0.491          | 0.003 | 0.010 | 0.006 |
| 18         | 0.926          | 0.005 | 0.069 | 0.008 |
| 19         | 0.382          | 0.005 | 0.079 | 0.008 |
| 20         | 0.373          | 0.004 | 0.044 | 0.005 |

*P* values were calculated by student t test.
